# Supplementary material
Source: PubMed Central journal article supplement (PMC7777391)
Supplement: NIHMS1579933-supplement-5.pdf [file NIHMS1579933-supplement-5.pdf]

Figure S4

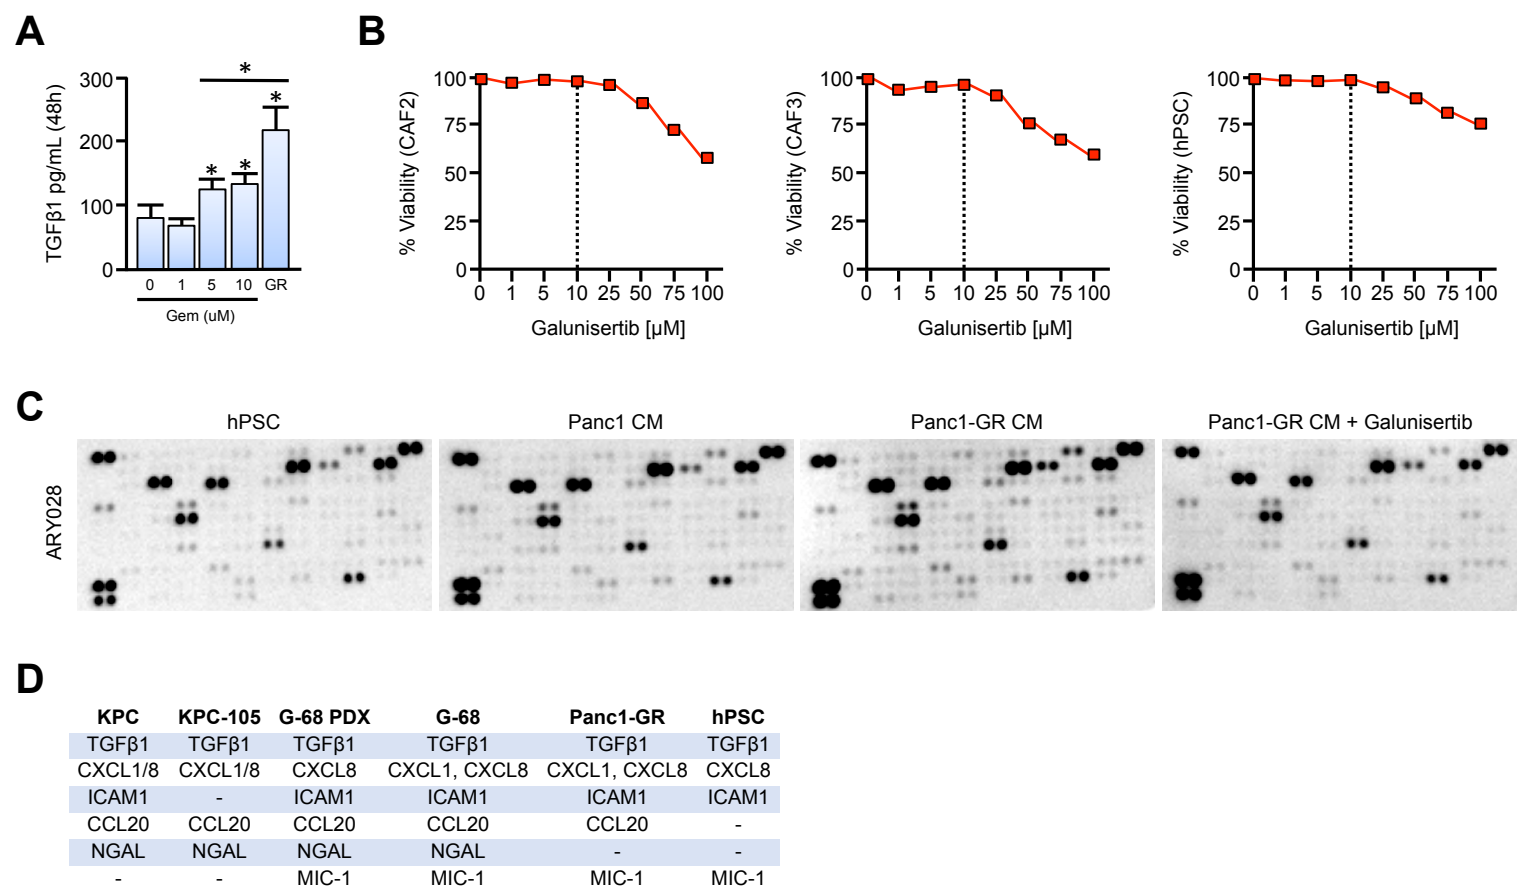

**Figure S4. Gemcitabine alters paracrine interactions between cancer and stromal cells *in vitro***  
(A) An equal number of Panc1 cells were incubated with 0, 1, or 5μM Gemcitabine over a 48-hour period, and Panc1-GR cells were grown in 10μM Gemcitabine for several passages. Culture media was collected and subjected to TGFβ1 ELISA (\*p < 0.05). (B) CAF2, CAF3, and hPSC cells were incubated with increasing concentrations of Galunisertib. After 72 hours cell viability was evaluated by MTT assay, showing a lack of cytotoxicity at the 10μM dose used in subsequent experiments. (C) hPSC cells were grown in either control (C), Panc1 conditioned (P), Panc1-GR (GR) conditioned media, or GR conditioned media (CM) with 10μM of the TGFBR1-inhibitor Galunisertib. After 48 hours, cells were incubated with a protein transport inhibitor for one hour, lysed, and subjected to high throughput proteome profiler array. Representative blots from each group are displayed above. (D) Table showing the most commonly altered cytokines across the six models systems examined.
