# Supplementary material
Source: PubMed Central journal article supplement (PMC7777391)
Supplement: NIHMS1579933-supplement-8.pdf [file NIHMS1579933-supplement-8.pdf]

**Figure S7**

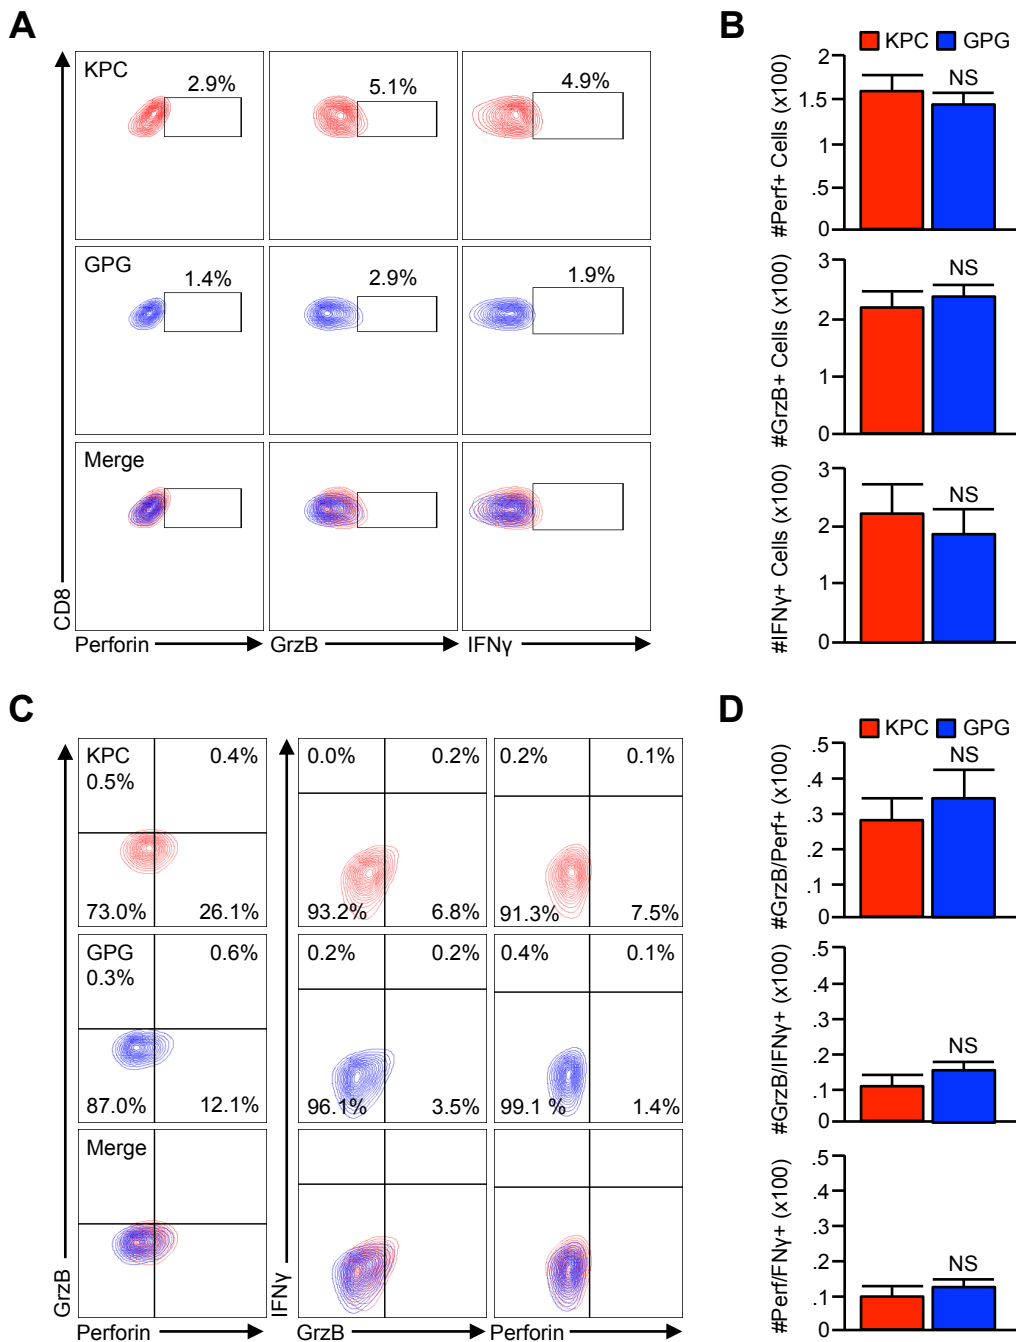

**Figure S7. The combination of Gemcitabine, Galunisertib, and anti-PD-1 does not significantly affect T-cell activation in the spleen**  
**(A,B)** Pdx1-Cre x LSL-*Kras*<sup>G12D</sup> x LSL-*TP53*<sup>R172H</sup> (KPC) mice were again used as a model of aggressive PDAC. At 90 days of age, mice were administered an intraperitoneal injection every other day of either PBS (KPC) or twice-weekly Gemcitabine starting at 90 days with the addition of Galunisertib and anti-PD-1 two weeks later (Gal/ $\alpha$ PD-1/Gem or G/P/G). Spleens were collected either when the animals were moribund or at the conclusion of the study (150 days post enrollment) and analyzed by flow cytometry for CD8+ T-cells, respectively. Cells were gated based on CD8 staining, and subsequently analyzed for expression of cytotoxic T-cell activation markers Perforin, GranzymeB, and Interferon  $\gamma$  (IFN $\gamma$ ). **(C,D)** CD8+ cells were gated as previously, and analyzed for the simultaneous expression of the aforementioned T-cell activation markers including GranzymeB and Perforin, GranzymeB, and IFN $\gamma$ , as well as Perforin and IFN $\gamma$ .
